# Supplementary material for: Peptide-guided lipid nanoparticles deliver mRNA to the neural retina of rodents and nonhuman primates
Source: PubMed Central journal article supplement — Sci Adv. 2023 Jan 11;9(2):eadd4623. doi: 10.1126/sciadv.add4623 (PMC9833661; doi:10.1126/sciadv.add4623), 2023-01-11
Supplement: sciadv.add4623_sm.pdf [file sciadv.add4623_sm.pdf]

Supplementary Materials for  
**Peptide-guided lipid nanoparticles deliver mRNA to the neural retina of  
rodents and nonhuman primates**

Marco Herrera-Barrera *et al.*

Corresponding author: Gaurav Sahay, [sahay@ohsu.edu](mailto:sahay@ohsu.edu)

*Sci. Adv.* **9**, eadd4623 (2023)  
DOI: 10.1126/sciadv.add4623

**The PDF file includes:**

Figs. S1 to S6  
Legend for table S1

**Other Supplementary Material for this manuscript includes the following:**

Table S1

**A**

Peptide sequence of top candidates against 661w cells

**661w Top five peptide candidates**

| Peptide Number slide | One letter code | Linker seq | Three-letter (targeting sequence) | Color  | pI (Isoelectric point) |
|----------------------|-----------------|------------|-----------------------------------|--------|------------------------|
| 42                   | SPALHFL         | GGGS[C]    | SerProAlaLeuHisPheLeu             | Orange | 6.63                   |
| 43                   | SNLAAFP         | GGGS[C]    | SerAsnLeuAlaAlaPhePro             | Cyan   | 5.02                   |
| 50                   | MPVAVYR         | GGGS[C]    | MetProValAlaValTyrArg             | Blue   | 7.25                   |
| 52                   | LAFHRMP         | GGGS[C]    | LeuAlaPheHisArgMetPro             | Red    | 7.4                    |
| 54 (54)              | HLSSLTP         | GGGS[C]    | HisLeuSerSerLeuThrPro             | Yellow | 6.63                   |

**B**

| Peptide Name | Acidic | Basic | Neutral | Hydrophobic |
|--------------|--------|-------|---------|-------------|
| MH42         | 0%     | 9%    | 45%     | 46%         |
| MH43         | 0%     | 0%    | 55%     | 45%         |
| MH50         | 0%     | 9%    | 36%     | 55%         |

**Figure S1.** Structural and Bioinformatic properties of top- and *in vivo*-tested candidate sequences with affinity to 661w cone cells. **(A)** 661w top binders with sequence and isoelectric focusing points. **(B)** Relevant characteristics of peptides that were synthesized for testing.

**A** Peptide sequence of top candidates against ARPE19 cells

**APRE-19 Top five peptide candidates**

| Peptide Number slide | One letter code | Linker seq | Three-letter (Targeting sequence) | Color   | pI (Isoelectric point) |
|----------------------|-----------------|------------|-----------------------------------|---------|------------------------|
| 3                    | DGPPRKP         | GGGS[C]    | AspGlyProProArgLysPro             | Magenta | 7.25                   |
| 50                   | MPVAVYR         | GGGS[C]    | MetProValAlaValTyrArg             | Blue    | 7.25                   |
| 52                   | LAFHRMP         | GGGS[C]    | LeuAlaPheHisArgMetPro             | Red     | 7.40                   |
| 54 (54)              | HLSSLTP         | GGGS[C]    | HisLeuSerSerLeuThrPro             | Yellow  | 6.63                   |
| 57                   | ATGPRSV         | GGGS[C]    | AlaThrGlyProArgSerVal             | Lime    | 7.25                   |

**B**

| Peptide Name | Acidic | Basic | Neutral | Hydrophobic |
|--------------|--------|-------|---------|-------------|
| MH3          | 8%     | 17%   | 67%     | 8%          |
| MH50         | 0%     | 9%    | 36%     | 55%         |

**Figure S2.** Structural and Bioinformatic properties of top- and *in vivo*-tested candidate sequences with affinity to ARPE-19 cells. **(A)** ARPE-19 top binders with sequence characteristics. **(B)** Relevant characteristics of peptides that were synthesized for testing.

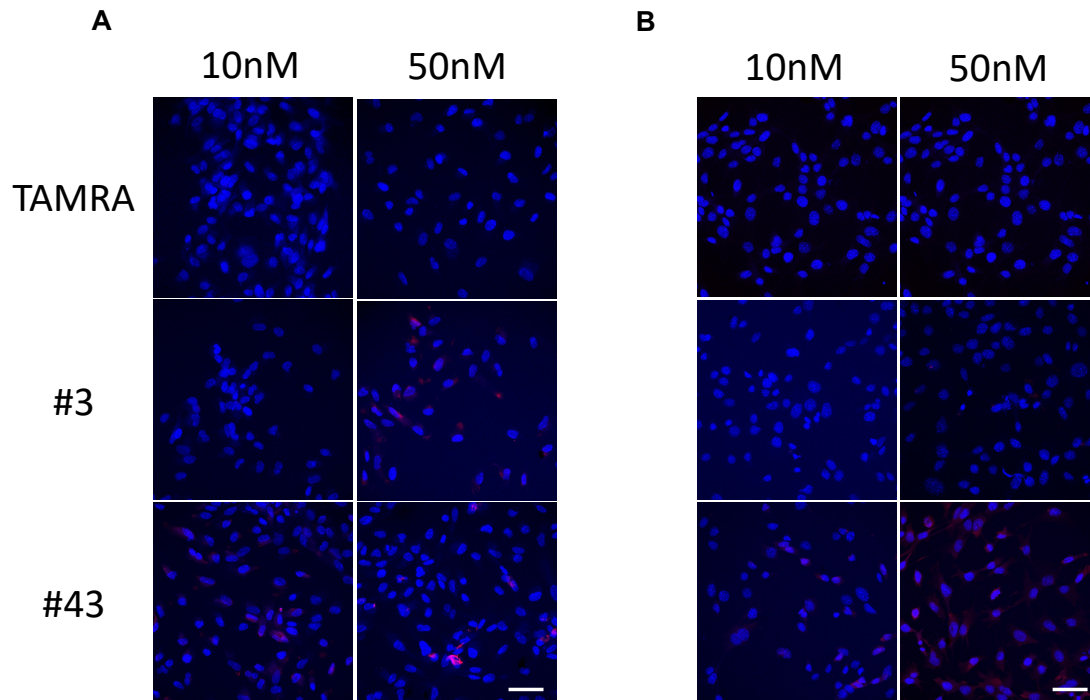

**Figure S3.** Cell uptake of TAMRA-labelled peptide candidates. Confocal microscopy images of **(A)** hARPE19 and **(B)** 661w cone cells incubated with 10nM and 50nM peptides MH3 and MH43. TAMRA dye used as negative control. Scale bars represent 50  $\mu$ m.

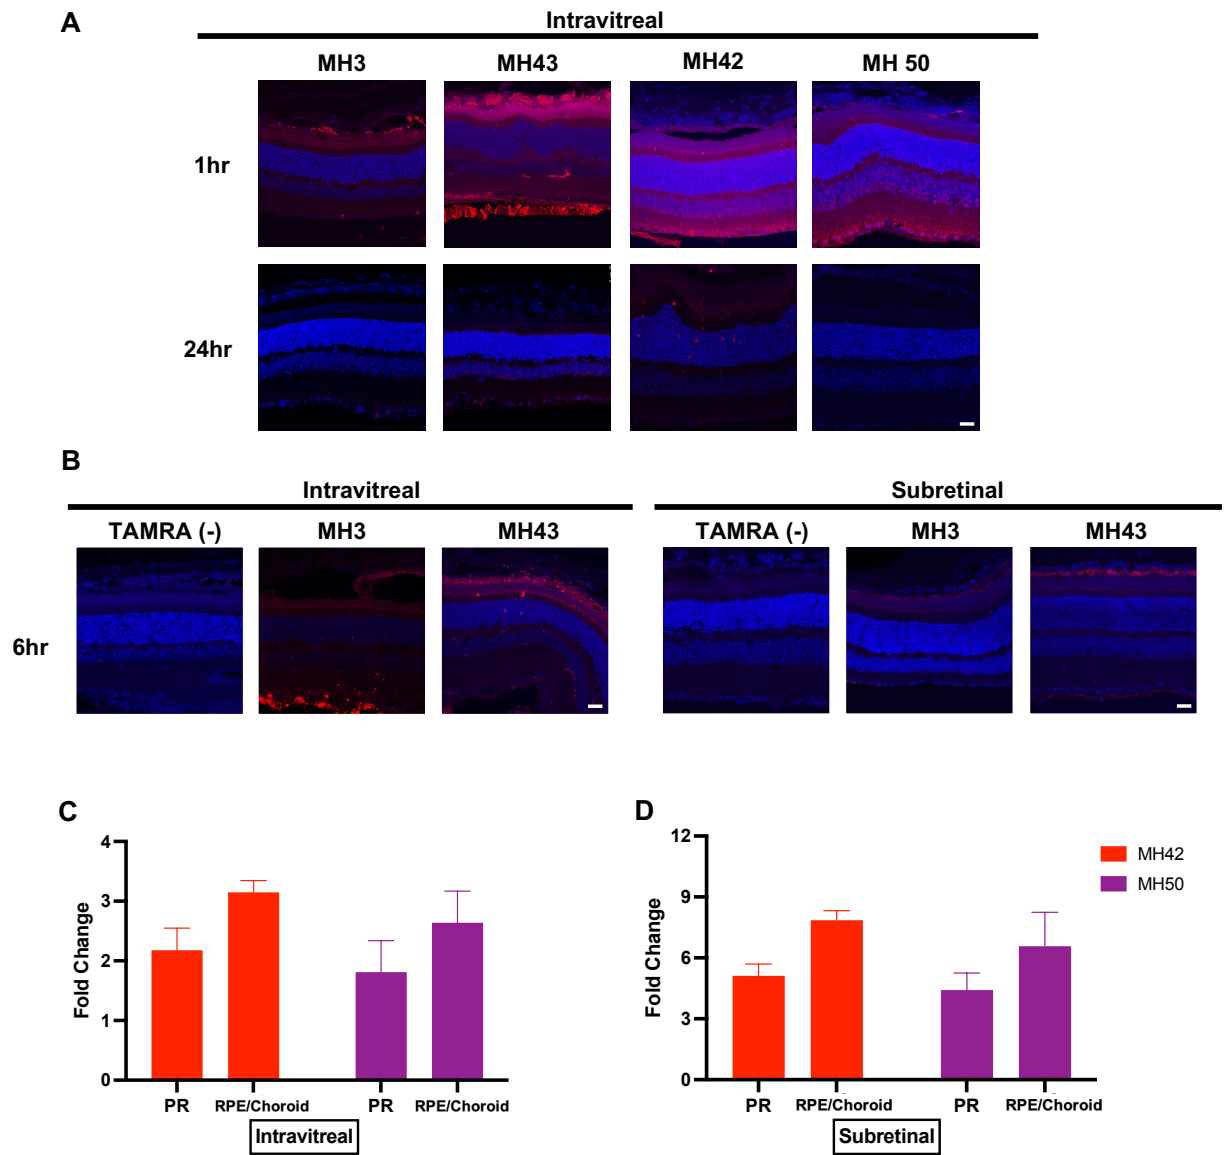

**Figure S4.** TAMRA-tagged peptide uptake in BALB/c mice. **(A)** Representative confocal microscopy images of BALB/c mice eyes intravitreally injected with peptides MH3, MH43, MH42 and MH50 collected at 1hr and 24hrs. **(B)** Representative confocal images of TAMRA- MH3 and -MH43 delivered intravitreally and subretinally. Scale bar represents 25  $\mu$ m. **(C-D)** Mean fluorescence intensity fold-change of peptide uptake in vivo of MH42 and MH50 over TAMRA control; n = 4-8 eyes per group.

**A**

← PEG amount in LNPs (Mol%) →

| PEG                          | LNPm-0%    | LNPm-0.15% | LNPm-0.3%  | LNPm-0.6%  | LNPm-0.9%  | LNPm-1.2%  |
|------------------------------|------------|------------|------------|------------|------------|------------|
| DMG-PEG 2000                 | 1.5        | 1.35       | 1.2        | 0.9        | 0.6        | 0.3        |
| DSPE-PEG (2000)<br>Maleimide | -          | 0.15       | 0.3        | 0.6        | 0.9        | 1.2        |
| <b>Total</b>                 | <b>1.5</b> | <b>1.5</b> | <b>1.5</b> | <b>1.5</b> | <b>1.5</b> | <b>1.5</b> |

**B**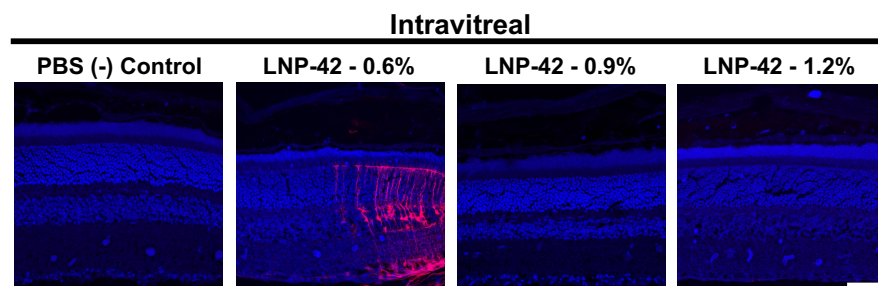

**Figure S5.** Ratios of peptide surface density and Ai9 *in vivo* injections. **(A)** Functionalized PEG component in LNP formulations with different peptide densities and **(B)** Confocal microscopy images of PBS injected control as well as 0.6-1.2% formulations tested. Scale bar represents 50  $\mu\text{m}$ .

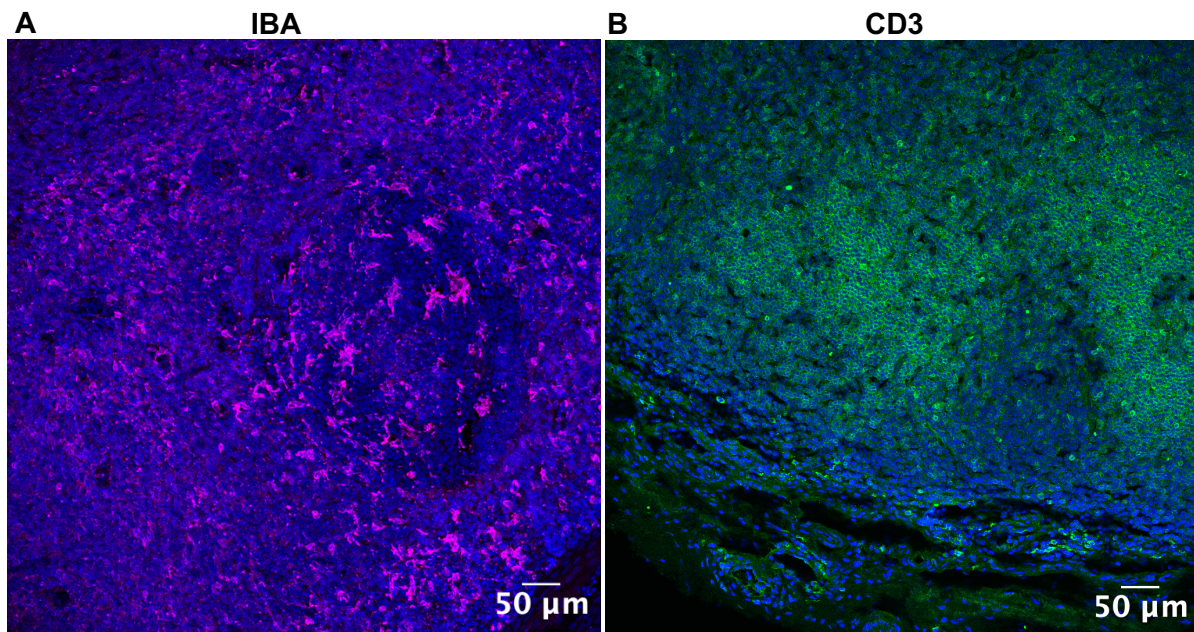

**Figure S6. (A)** Confocal image of rhesus tonsil stained with IBA-1 (microglia, magenta) and DAPI (blue). **(B)** Confocal image of rhesus tonsil stained with CD3 (T cells, green) and DAPI (blue). Slides were stained alongside retinal cross-sections to serve as positive controls.

**Supplemental Excel File 1 (Table S1).** Schrödinger™ QikProp output values for pharmaceutically relevant properties for peptide sequences isolated. Peptide sequences ordered with added linker (blue). The supplementary excel file is available as a supplementary document.
